# Supplementary material for: Direct Competition between hnRNP C and U2AF65 Protects the Transcriptome from the Exonization of Alu Elements
Source: PubMed Central journal article supplement (PMC3629564; doi:10.1016/j.cell.2012.12.023), 2013-01-31

# S1A (Part 1 of 3)

## ABCC5

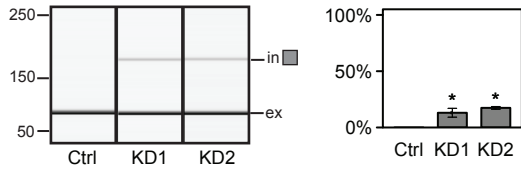

## EI24

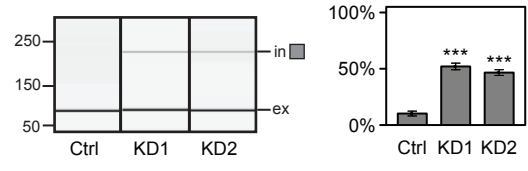

## AGL

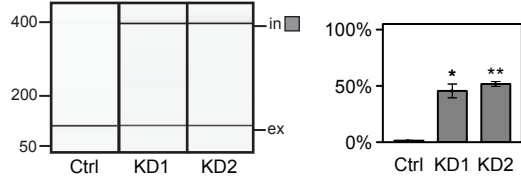

## GMPS

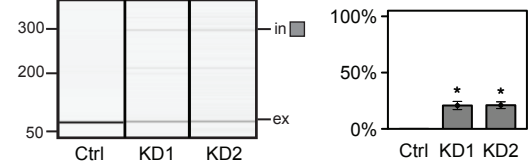

## CHAMP1

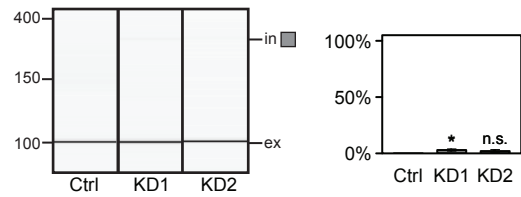

## HELLS

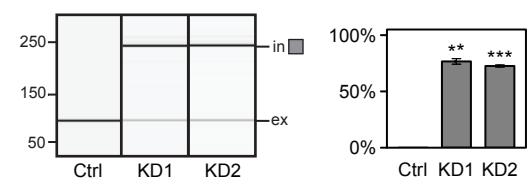

## COX7B

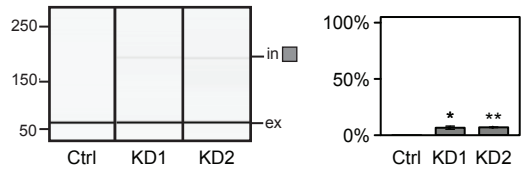

## ITGB1

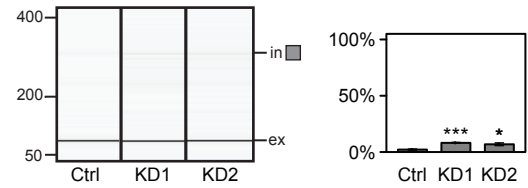

## DDX21

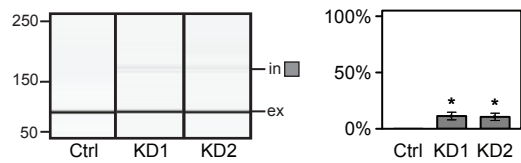

## KIAA1432

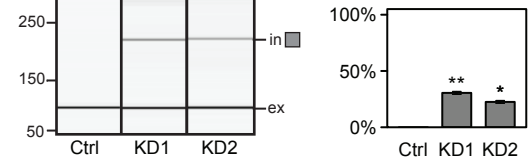

## DRAM1

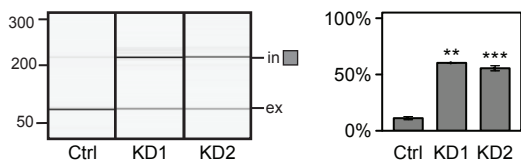

## LOH12CR1

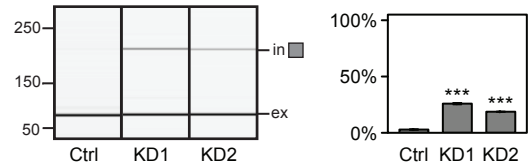

## DTWD1

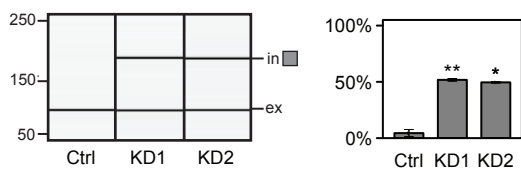

## MBD3

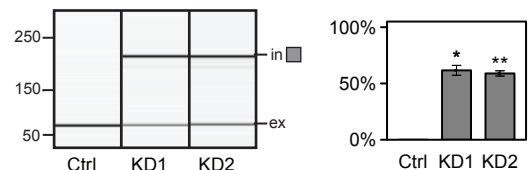

## S1A (Part 2 of 3)

### MIPEP

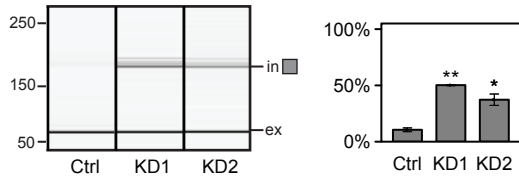

### POLE

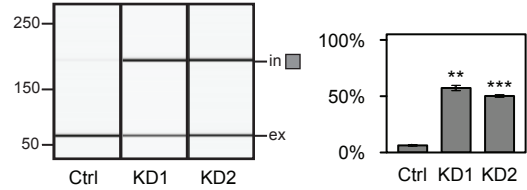

### MLL5

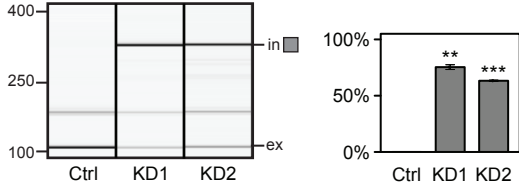

### PTS

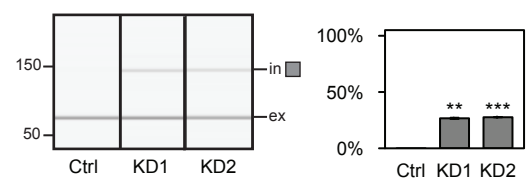

### MTO1

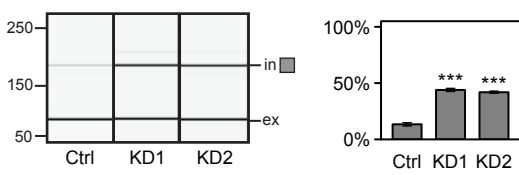

### PUM1

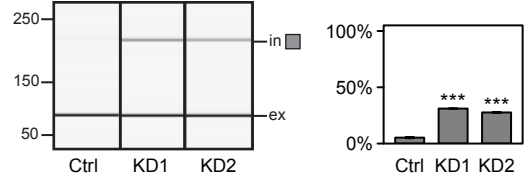

### NOLC1

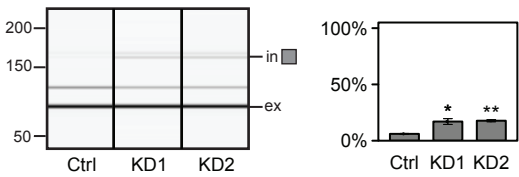

### QTRT1

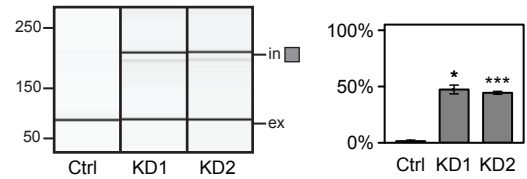

### NSUN3

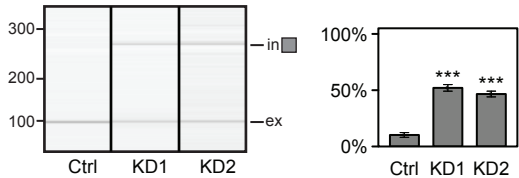

### RACGAP1

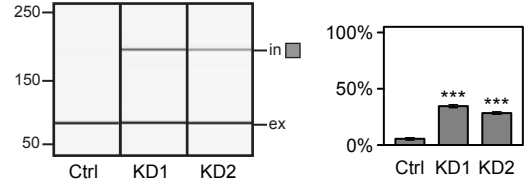

### NVL

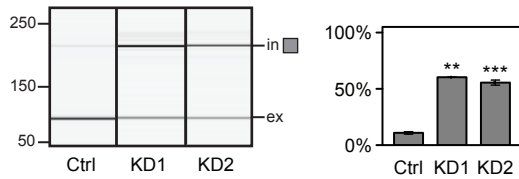

### RAD52

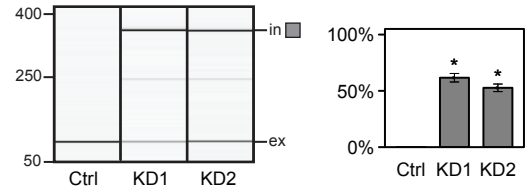

### PEX14

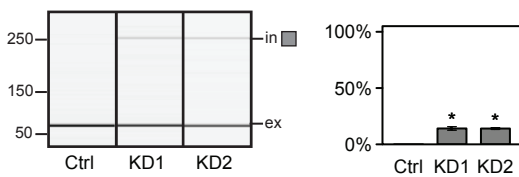

### SASS6

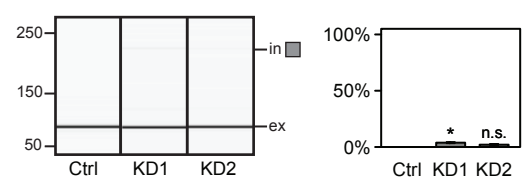

# S1A (Part 3 of 3)

## SF3B3

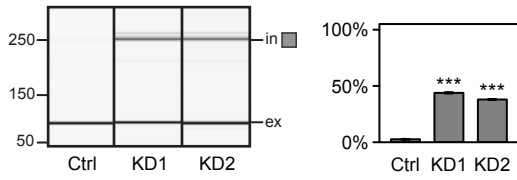

## TNPO3

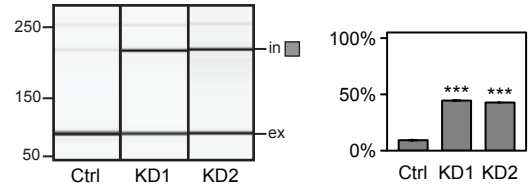

## SPG7

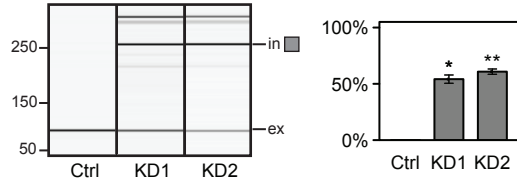

## TOR1AIP1

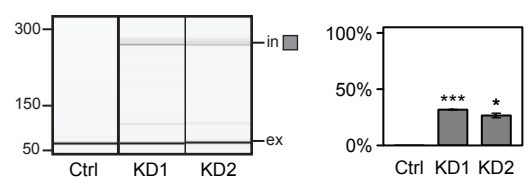

## SSR1

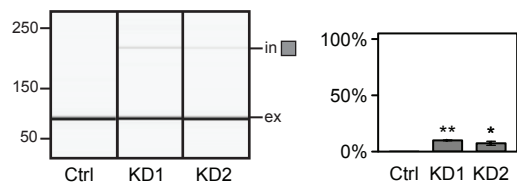

## VHL

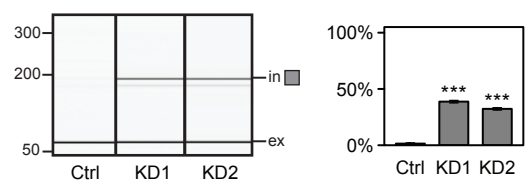

## SUGP2

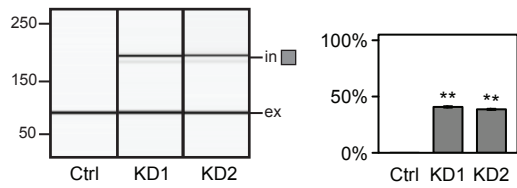

## WRN

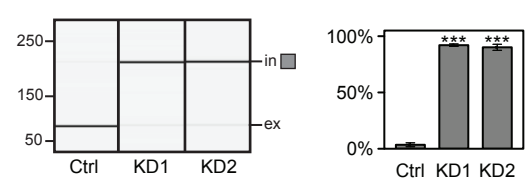

## SULT1A1

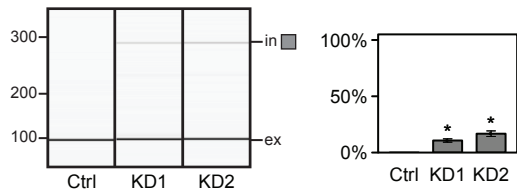

## ZFX

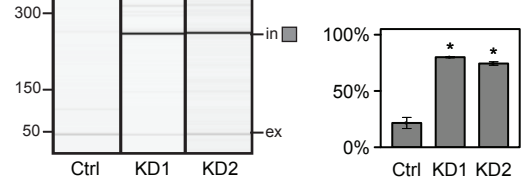

## TCFL5

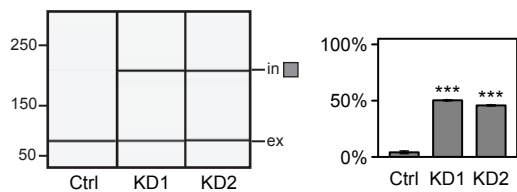

# S1B

## ADSSL1

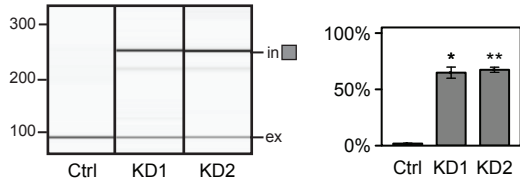

## IL6R

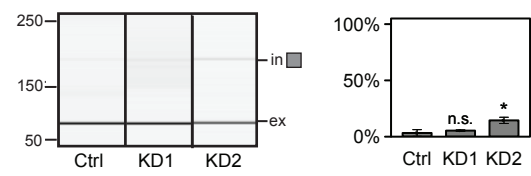

## BLM

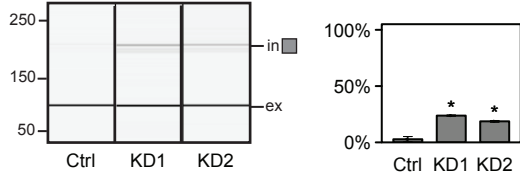

## NPLOC4

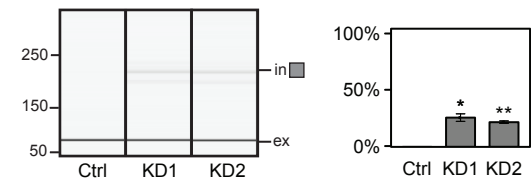

## CDK5RAP2

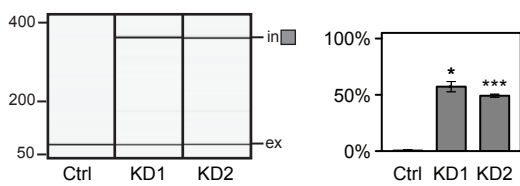

## NUP133

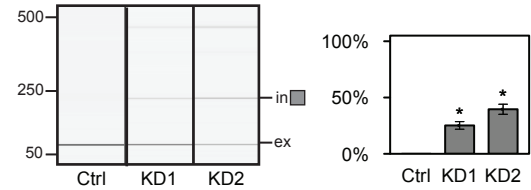

## CGRRF1

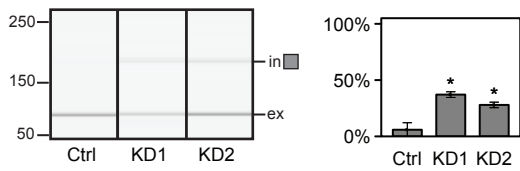

## NUP160

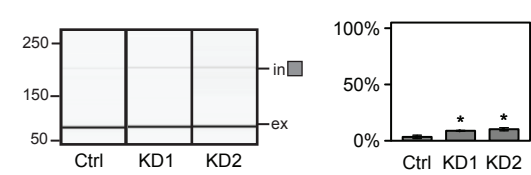

## CSPP1

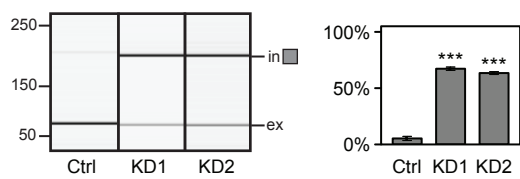

## PCNX

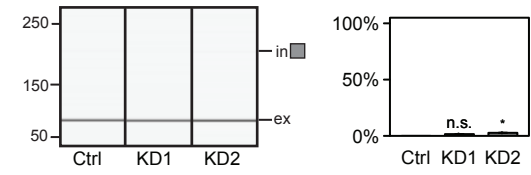

## DAP3

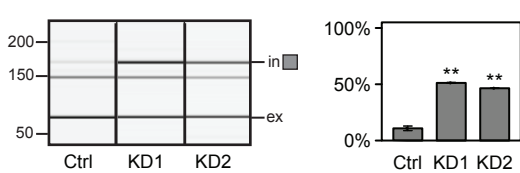

## RPS15A

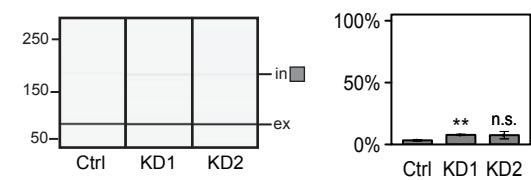

## DDX23

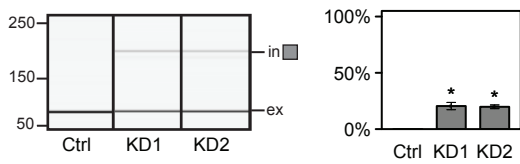

## YARS2

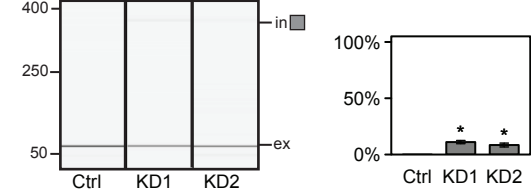

## EDC3

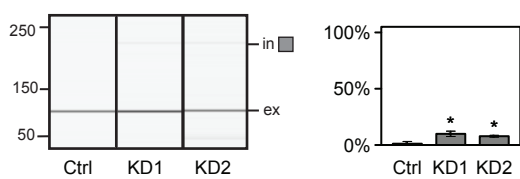

## ZNF791

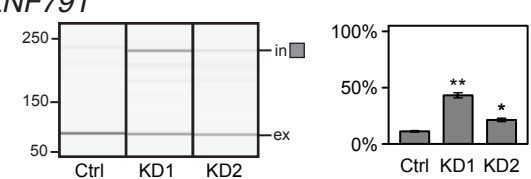

**S1C**

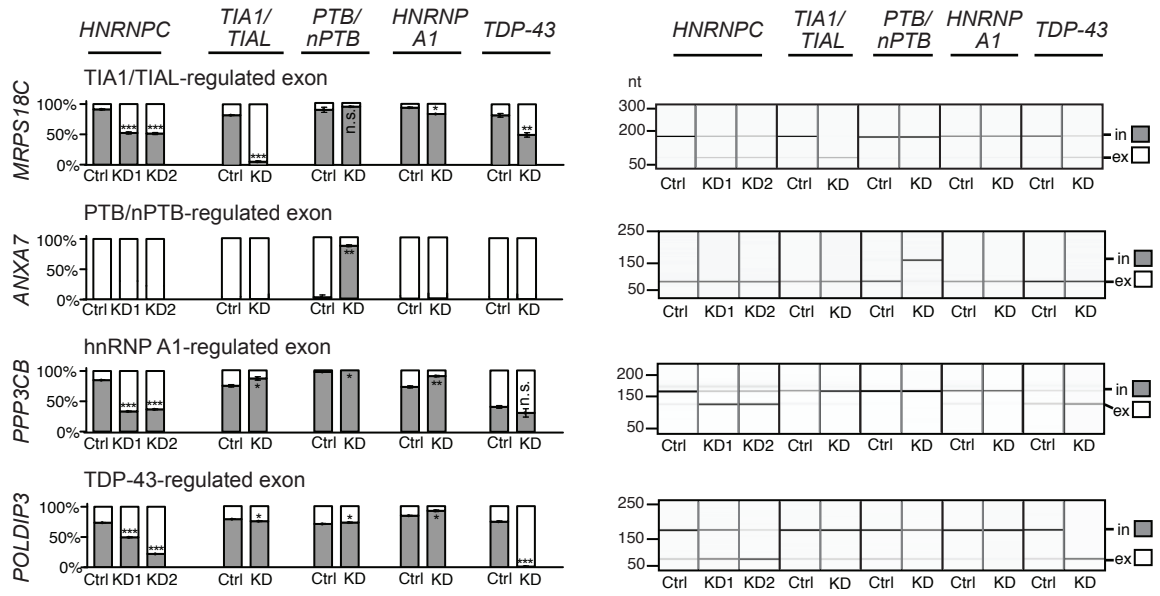

Supplement: mmc5.pdf [file mmc5.pdf]
