# Supplementary material for: Direct Competition between hnRNP C and U2AF65 Protects the Transcriptome from the Exonization of Alu Elements
Source: PubMed Central journal article supplement (PMC3629564; doi:10.1016/j.cell.2012.12.023), 2013-01-31
Supplement: mmc1.pdf [file mmc1.pdf]

**Table S1. iCLIP and RNA-Seq Mapping Statistics, Related to Experimental Procedures**

| <b>hnRNP C iCLIP</b>               | Replicate 1<br>(LUjh03 <sup>1</sup> ) | Replicate 2<br>(LUjh25) | <b>Total</b>      |
|------------------------------------|---------------------------------------|-------------------------|-------------------|
| Total reads                        | 17,016,384                            | 20,525,828              | <b>37,542,212</b> |
| Total crosslink events             | 4,869,687                             | 9,488,133               | <b>14,357,820</b> |
| Total crosslink sites              | 4,412,114                             | 8,131,878               | <b>11,899,326</b> |
| Binding sites (Flank 10; FDR 0.05) | ND                                    | ND                      | <b>438,360</b>    |
| Binding sites in annotated genes   | ND                                    | ND                      | <b>392,818</b>    |

  

| <b>U2AF65 iCLIP (Ctrl)</b>        | Replicate 1<br>(LUjh23_1) | Replicate 2<br>(LUjh23_2) | <b>Total</b>      |
|-----------------------------------|---------------------------|---------------------------|-------------------|
| Total reads                       | 2,478,269                 | 15,555,645                | <b>18,033,914</b> |
| Total crosslink events            | 1,781,117                 | 10,135,903                | <b>11,917,020</b> |
| Total crosslink sites             | 1,488,737                 | 7,209,165                 | <b>8,214,397</b>  |
| Binding sites (Flank 5; FDR 0.05) | ND                        | ND                        | <b>518,794</b>    |

  

| <b>U2AF65 iCLIP (KD1)</b>         | Replicate 1<br>(LUjh21_1) | Replicate 2<br>(LUjh21_2) | <b>Total</b>      |
|-----------------------------------|---------------------------|---------------------------|-------------------|
| Total reads                       | 4,378,005                 | 6,228,475                 | <b>10,606,480</b> |
| Total crosslink events            | 3,077,838                 | 4,384,385                 | <b>7,462,223</b>  |
| Total crosslink sites             | 2,626,609                 | 3,596,131                 | <b>5,778,770</b>  |
| Binding sites (Flank 5; FDR 0.05) | ND                        | ND                        | <b>330,674</b>    |

  

| <b>U2AF65 iCLIP (KD2)</b>         | Replicate 1<br>(LUjh22_1) |  | <b>Total U2AF65</b> |
|-----------------------------------|---------------------------|--|---------------------|
| Total reads                       | 11,330,534                |  | <b>39,970,928</b>   |
| Total crosslink events            | 8,227,587                 |  | <b>27,606,830</b>   |
| Total crosslink sites             | 6,254,382                 |  | <b>16,994,031</b>   |
| Binding sites (Flank 5; FDR 0.05) | 363,844                   |  | <b>1,122,142</b>    |
| Binding sites in annotated genes  | ND                        |  | <b>996,784</b>      |

  

| <b>RNA-seq (Ctrl)</b>         | Replicate 1 | Replicate 2 | <b>Total</b>       |
|-------------------------------|-------------|-------------|--------------------|
| Total reads                   | 120,269,114 | 127,222,962 | <b>247,492,076</b> |
| Mapped                        | 102,679,885 | 101,888,778 | <b>204,568,663</b> |
| Mapped (% of total reads)     | 85.4        | 80.1        | <b>82.7</b>        |
| Uniquely mapped               | 99,206,481  | 98,420,834  | <b>197,627,315</b> |
| Uniquely mapped (% of mapped) | 96.6        | 96.6        | <b>96.6</b>        |
| Junction-spanning             | 20,687,792  | 20,210,793  | <b>40,898,585</b>  |

  

| <b>RNA-seq (KD1)</b>          | Replicate 1 | Replicate 2 | <b>Total</b>       |
|-------------------------------|-------------|-------------|--------------------|
| Total reads                   | 59,483,704  | 65,331,134  | <b>124,814,838</b> |
| Mapped                        | 51,049,794  | 55,786,169  | <b>106,835,963</b> |
| Mapped (% of total reads)     | 85.8        | 85.4        | <b>85.6</b>        |
| Uniquely mapped               | 49,387,650  | 53,933,424  | <b>103,321,074</b> |
| Uniquely mapped (% of mapped) | 96.7        | 96.7        | <b>96.7</b>        |
| Junction-spanning             | 9,046,955   | 9,221,022   | <b>18,267,977</b>  |

  

| <b>RNA-seq (KD2)</b>          | Replicate 1 | Replicate 2 | <b>Total</b>       |
|-------------------------------|-------------|-------------|--------------------|
| Total reads                   | 63,752,362  | 64,691,484  | <b>128,443,846</b> |
| Mapped                        | 55,201,140  | 54,369,665  | <b>109,570,805</b> |
| Mapped (% of total reads)     | 86.6        | 84          | <b>85.3</b>        |
| Uniquely mapped               | 53,281,319  | 52,506,281  | <b>105,787,600</b> |
| Uniquely mapped (% of mapped) | 96.5        | 96.6        | <b>96.5</b>        |
| Junction-spanning             | 9,755,630   | 10,275,003  | <b>20,030,633</b>  |

<sup>1</sup> Names in brackets indicate internally used library identifiers

For the iCLIP experiments, the number of total reads as well as of detected crosslink events and crosslink sites after mapping and random barcode evaluation are given for each replicate. In addition, binding sites were called on the collapsed iCLIP data of each sample type. U2AF65 iCLIP as well as RNA-seq experiments were performed from *HNRNPC* knockdown (KD1 and KD2) and control (Ctrl) HeLa cells. Summarized counts for the collapsed U2AF65 iCLIP data from both *HNRNPC* knockdowns and control HeLa cells ('Total U2AF65') can be found after U2AF65 iCLIP (KD2).

**Table S2. Exon Predictions and Regulation, Related to Experimental Procedures**

**Exon predictions**

| Category                    | Total   | Non-overlapping |
|-----------------------------|---------|-----------------|
| Total Cufflinks exons       | 178,029 | 140,621         |
| Corresponding Ensembl genes | 14,091  | 13,975          |
| Novel exons                 | 16,143  | 13,875          |
| <i>Alu</i> exons            | 2,085   | 1,903           |
| Novel <i>Alu</i> exons      | 1,406   | 1,318           |

**Exon regulation**

| Conditional thresholding<br>( $p$ value <sub>a</sub> <sup>1</sup> < 0.01 & $p$ value <sub>b</sub> < 0.05) | Total      | Up         | Down       |
|-----------------------------------------------------------------------------------------------------------|------------|------------|------------|
| Total exons                                                                                               | 3,052      | 1,807      | 1,245      |
| Novel exons                                                                                               | 894<br>29% | 754<br>41% | 140<br>11% |
| <i>Alu</i> exons                                                                                          | 363        | 361        | 2          |

| <i>Alu</i> exon regulation           | Total | Up    | Down |
|--------------------------------------|-------|-------|------|
| Called by DEXSeq                     | 363   | 361   | 2    |
| >2-fold change, not called by DEXSeq | 778   | 662   | 116  |
| Total regulated                      | 1,141 | 1,023 | 118  |

<sup>1</sup> For the conditional thresholding, the  $p$  value of differential exon inclusion has to be < 0.01 in at least one *HNRNPC* knockdown ( $p$  value<sub>a</sub>) and < 0.05 in the second knockdown ( $p$  value<sub>b</sub>).

Top: 'Total' refers to all exons that were predicted by Cufflinks (see Extended Experimental Procedures for additional quality filtering steps). 'Non-overlapping' refers to the restricted set of exons that did not overlap with any other annotated exon and that was used in the DEXSeq analyses. 'Novel' refers to exons that do not overlap with any exon in the Ensembl database (version 60). '*Alu* exons' show at least one splice site within an antisense *Alu* element (taken from RepBase) that is supported by at least one junction-spanning read from the collapsed RNA-seq data. Bottom: 'Total' refers to the total number of differentially spliced exons (only stand-alone exons were taken into account). For the 'conditional thresholding', the  $p$  value of differential exon inclusion has to be < 0.01 in at least one *HNRNPC* knockdown ( $p$  value<sub>a</sub>) and < 0.05 in the second knockdown ( $p$  value<sub>b</sub>). In addition to the DEXSeq calls, we also report *Alu* exons that show an at least 2-fold change in inclusion.
